# Supplementary material
Source: HighWire-hosted journal article supplement (http://rc.rcjournal.com/highwire/filestream/27309/field_highwire_adjunct_files/1/rc-11580-File004.docx)

**Schematic diagram of an oxygen supply system**
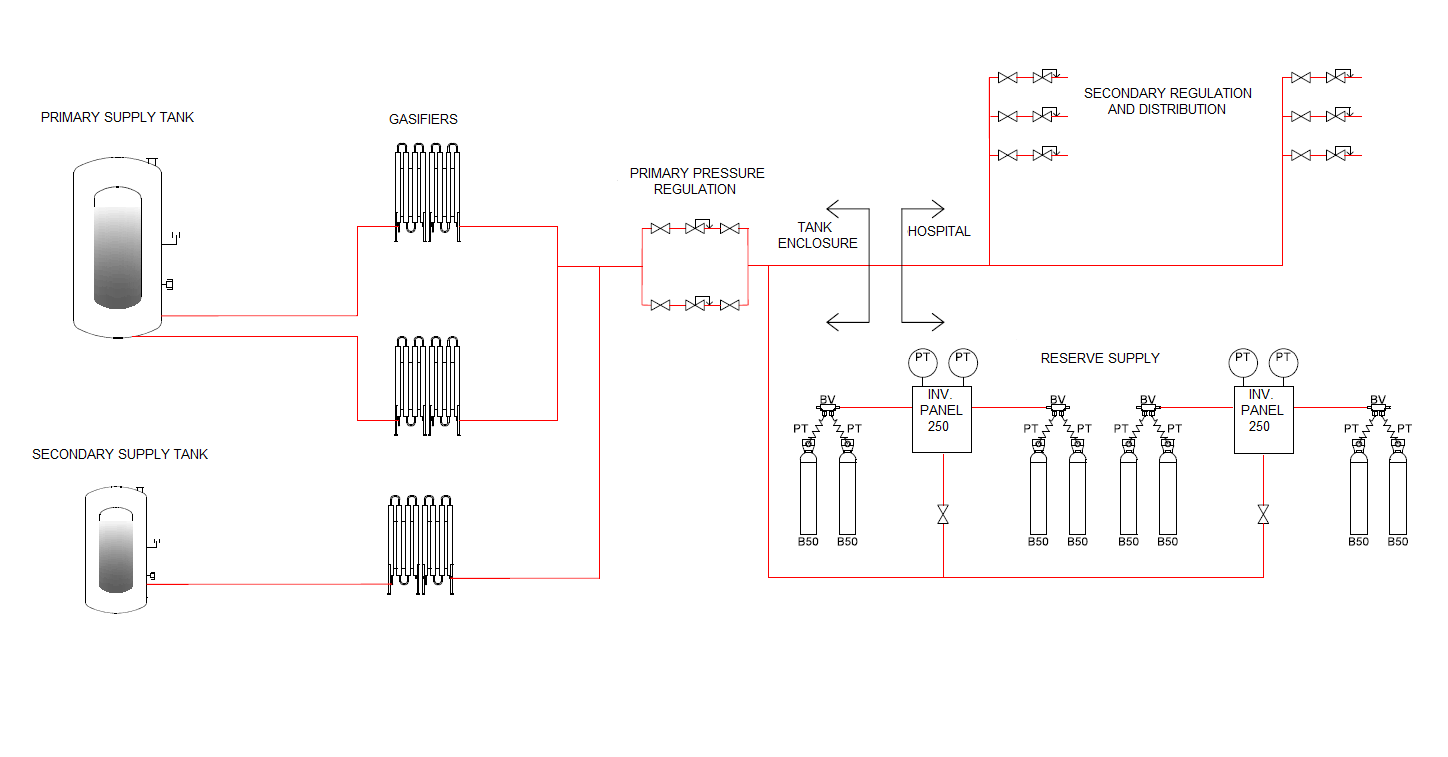

Supplement: rc-11580-File004.docx [file rc-11580-File004.docx]
